# Supplementary material
Source: Research Square preprint supplement (doi:10.21203/rs.3.rs-9213627/v1)
Supplement: Supplementary file 1 [file 3e2e1f5015c1fa44319cf0fe.docx]

Procedural Simulation Workflow Based on 3D-Printed Models
