# Supplementary material
Source: Research Square preprint supplement (doi:10.21203/rs.3.rs-9213627/v1)
Supplement: Supplementary file 2 [file 50c3509efe949a0bd32a5c81.docx]

Table 1. Baseline Characteristics of Patients in the 3DP-Guided and Image-Guided Groups

| **Variables** | Total (n=46) | 3DP-guided group (n=22) | Image-guided group (n=24) | P-value |
| --- | --- | --- | --- | --- |
| **Clinical Variables** |  |  |  |  |
| Age, years | 68.9 ± 8.8 | 68.0 ± 9.8 | 69.3 ± 8.3 | 0.711 |
| Male sex, n (%) | 31 (67.3%) | 15 (68.2%) | 16 (66.7%) | 0.913 |
| History of smoking, n (%) | 17 (40.0%) | 7 (31.8%) | 10 (41.7%) | 0.489 |
| Coronary artery disease, n (%) | 20 (43.5%) | 9 (40.9%) | 11 (45.8%) | 0.736 |
| Diabetes mellitus, n (%) | 9 (19.6%) | 4 (18.2%) | 5 (20.8%) | >0.999 |
| Hypertension, n (%) | 35 (76.1%) | 16 (72.7%) | 19 (79.1%) | 0.609 |
| COPD , n(%) | 7 (15.2%) | 4 (18.2%) | 3 (12.5%) | 0.900 |
| ASA class IV , n(%) | 22 (47.8%) | 10 (45.4%) | 12 (50.0%) | 0.768 |
| **Type of Aortic Aneurysm** |  |  |  |  |
| Abdominal aortic aneurysm (AAA), n (%) | 26 (56.5%) | 13 (59.0%) | 13 (54.2%) | 0.736 |
| Juxtarenal AAA | 21 (41.3%) | 9 (40.9%) | 10 (41.7%) | 0.958 |
| Pararenal AAA | 7 (15.2%) | 4 (18.2%) | 3 (12.5%) | 0.900 |
| Thoracoabdominal aortic aneurysm (TAAA), n (%) | 8 (17.4%) | 3 (13.6%) | 5 (20.8%) | 0.800 |
| Thoracic aortic aneurysms (TAA), n (%) | 12 (26.1%) | 6 (27.2%) | 6 (25.0%) | 0.861 |
| **Anatomical Characteristic** |  |  |  |  |
| Chronic aortic dissection | 10 (21.7%) | 4 (18.2%) | 6 (25.0%) | 0.840 |
| Type I endoleak repair | 5 (10.9%) | 3 (13.6%) | 2 (8.3%) | 0.918 |
| Aneurysm diameter ≥ 55 mm, n (%) | 18 (39.1%) | 8 (36.4%) | 10 (41.7%) | 0.713 |
| High aneurysm neck angle (>60°), n (%) | 8 (17.4%) | 4 (18.2%) | 4 (16.7%) | >0.999 |
| Severe vessel calcification, n (%) | 14(30.4%) | 6 (26.7%) | 8 (33.3%) | 0.655 |

ASA = American Society of Anesthesiologists; COPD = Chronic Obstructive Pulmonary Disease;

Note: Values are presented as mean ± standard deviation or number (percentage). P-values were calculated using Student’s t-test or Chi-square test where appropriate.

Table 2. Mechanical Properties and Dynamic Testing of Materials

|  | Mechanical properties | | |  | Hemodynamic test | | |
| --- | --- | --- | --- | --- | --- | --- | --- |
| Material | Elastic Modulus  (E, MPa) | Tensile Strength (Rm, MPa) | Shore A Hardness |  | Deformation Degree | Pressure Toleration | Pressure Maintainance |
| Silicone 5 | 0.1 | 2.5 | 0-3 |  | Large | Good, no rupture | 70-80/40-45mmHg |
| Silicone 10 | 0.9 | 3.0 | 9-11 |  | good | Good, no rupture | Normal pressure (120/80 mmHg) |
| Silicone 20 | 2.1 | 3.5 | 19-21 |  | Least | Rupture | Normal pressure (120/80 mmHg) |
| TangoPlus | 2.5 | 1.5 | 24-26 |  | Not tested | Not tested | Not applicable |
| Native AAA wall[12] | 1.2* | 2.5* | 10-12* |  | Normal | Normal | Normal pressure (120/80 mmHg) |

12: Wang’s study.

Table 3. Hemodynamic Results in Patient-specific Models

| Parameter | In Vivo | 3DP Model | P-value |
| --- | --- | --- | --- |
| Inlet velocity (m/s) | 1.52 ± 0.18 | 1.48 ± 0.20 | 0.274 |
| Aneurysmal velocity (m/s) | 1.25 ± 0.15 | 1.20 ± 0.18 | 0.312 |
| Outlet velocity (m/s) | 1.38 ± 0.16 | 1.35 ± 0.17 | 0.401 |

Table 4. Preoperative Simulation Results Based on 3D-printed Anatomic and Dynamic Functional Models (n=22)

| **Pt** | **Age** | **Sex** | **Type of Aneurysm** | **Max Diameter (mm)** | **Stent Type & Size** | **Involved Branches and Treatment** | **Predicted Risk of Endoleak** | **Added Value of Dynamic Model (Y/N)** | **Agreement with Actual Surgery (Y/N)** |
| --- | --- | --- | --- | --- | --- | --- | --- | --- | --- |
| 1 | 75 | M | TAA | 61 | Ankura 46×200 | F (IA, LCCA, LSA) | No | N | Y |
| 2 | 70 | M | TAAA() | 52 | Ankura 46×200 | F (LCCA、LSA) | No | Y/3 | Y |
| 3 | 50 | M | TAAA(AD) | 54 | Ankura 30×26×160 | F (CA,SMA,LRA,RRA) | No | Y/3+4 | Y |
| 4 | 79 | M | J-AAA | 75 | Yuranos 28×12×120 | F(RRA) | Moderate | Y/2 | Y |
| 5 | 74 | M | J-AAA | 35 | Yuranos 24×12×120 | F (LRA) | Mild | N | Y |
| 6 | 72 | M | J-AAA | 35 | Endurant 23×13×170 | F (RRA) | Mild | N | Y |
| 7 | 67 | M | J-AAA | 49 | Yuranos 28×12×120 | F (LRA) | No | N | Y |
| 8 | 64 | F | TA(ER) | 58 | Ankura 34×200 | F (IA, LCCA, LSA) | Moderate | Y/2 | Y |
| 9 | 43 | M | TAAA(AD) | 48 | Ankura 32×28×120 | F(CA,SMA,LRA,RRA) | Mild | Y/1+3+4 | Y |
| 10 | 68 | F | TAA | 59 | Valiant 30×200 | E(LSA) | Moderate | Y/1+2 | Y |
| 11 | 71 | M | TAA | 44 | Castor 34×28×200 | F(LSA)+B(LCCA) | No | N | Y |
| 12 | 76 | M | AA(ER) | 57 | Ankura 28×28×80 | F(CA,SMA,LRA,RRA) | Mild | N | Y |
| 13 | 79 | M | AA(ER) | 69 | None | F(CA,SMA,LRA,RRA) | Mild | N | N |
| 14 | 69 | F | J-AAA | 65 | Yuranos 28×12×120 | F (LRA, RRA) | Moderate | Y/1+2+4 | Y |
| 15 | 67 | M | TAA | 57 | Ankura 38×30×200 | F (IA, LCCA, LSA) | Mild | Y/1 | Y |
| 16 | 74 | M | P-AAA | 45 | Ankura 24×20×120 | F(CA,SMA,LRA,RRA) | Moderate | Y/2 | Y |
| 17 | 72 | M | P-AAA | 47 | Endurant 25×13×145 | F(LRA, RRA) | No | N | Y |
| 18 | 83 | M | J-AAA | 42 | Endurant 23×13×166 | F (LRA) | No | N | Y |
| 19 | 63 | M | TAA | 43 | Ankura 36×32×160 | F（RSA、LSA） | Mild | N | Y |
| 20 | 65 | M | J-AAA | 52 | Endurant 28×16×166 | F (LRA, RRA) | Mild | N | Y |
| 21 | 60 | M | P-AAA | 87 | Endurant 28×16×166 | F(SMA) | Moderate | Y/1+2 | Y |
|  |
| 22 | 58 | M | J-AAA | 51 | Ankura 28×24×120 | F(CA,SMA,LRA,RRA) | Mild | N | Y |  |

AAA: abdominal aortic aneurysm, TAA: thoracic aortic aneurysms, TAAA: thoracoabdominal aortic aneurysm， ER：endoleak repair, AD：aneurysms with dissection, CA：coeliac artery, SMA: superior mesenteric artery，RRA: right Renal artery，LRA: left renal artery，LSA：left subclavian artery，IA：innominate artery， LCCA：left common carotid artery

Note: Clinical application of the dynamic model was categorized as follows: Y/1, cases with fenestrations on aneurysmal walls; Y/2, cases with potential endoleak; Y/3, cases with dissecting aneurysms; Y/4, cases with complex branch vessels.

Involved Branches and Treatment were categorized as follows: F-Fenestration; B-Branch; E- E-Embolism.

Table 5. Comparison Between Rigid and Soft 3D-Printed Models for Endovascular Simulation

|  | Rigid Model | Soft Model |
| --- | --- | --- |
| **3D Printing** |  |  |
| Fabrication Method | Direct printing | Model printing + molding |
| Modeling Time (h) | 1/2(with AD) | 2/3(with AD) |
| Printing Time (h) | 2-3(AA)/3-4(TA) | 3-5(AA)/6-8(TA) |
| Post-processing Steps | Cleaning, curing  Removing supports  Polishing | Silicone casting,  Gelation,  Mold dissolution |
| Post-processing Time (h) | 0.5-1.0 | 2.0 |
| Material Cost (RMB) | 300 | 100 |
| **Material Properties** |  |  |
| Color | Transparent | Transparent |
| Hardness (Shore A/D) | 85D (Rigid) | 10–100A (Flexible) |
| Tensile Strength (MPa) | 48 | 1.5–45 (Adjustable) |
| **Primary Applications** |  |  |
| Structural Simulation | Yes | Yes |
| Dynamic Simulation | No | Yes |
| Typical Use Cases | 1. Fenestration positioning 2. Anatomical demonstration and teaching | 1. Fenestration positioning and cutting 2. Simulation of moderate deformation 3. Hemodynamic simulation and evaluation |
| Applicable Anatomies | Cases with stable vascular anatomy | Especially suitable for: 1. Involving branch on aneurysmal walls or with complex structure  2. Dissecting aneurysms 3. Poor stent apposition |

AD: aortic dissection, AA: abdominal aorta, TA: thoracic aorta.

Table 6. Comparison between 3DP-guided group and image-guided group

| Parameters | 3DP-guided group (n=22) | Image-guided group (n=24) | P-value |
| --- | --- | --- | --- |
| Operative time (min) | 133.6±43.3 | 171.4±72.1 | 0.04 |
| Contrast volume used (mL) | 181.7±68.6 | 234.9±101.0 | 0.04 |
| Number of device adjustments | 0.4 ± 0.9 | 0.5 ± 1.1 | 0.64 |
| Incidence of intraoperative endoleak (%) | 4.5 | 12.5 | 0.40 |
| Severe complications within 30 days (%) | 4.5 | 4.2 | >0.99 |
| Aneurysm rupture or stent migration (%) | 0 | 0 | 1 |
